1       The Abnormal Oswald Ripening of Protein Nanofiber in Myofibrillar  
2                                   Protein Solution

3                       Fuge Niu<sup>1†</sup>, Rui Zhang<sup>1†</sup>, Jiamei Fan<sup>1</sup>, Weichun Pan<sup>1\*</sup>

4       <sup>1</sup>*The School of Food Science and Biotechnology, Zhejiang Gongshang University,*

5       *Xiasha Gaojiao Garden, Xuezheng Street 18, Hangzhou, China 310018*

6       <sup>†</sup> *Equal contribution*

7

8

9

10

11

12

13

14

15

16

17

18

19

20

21

22

23 Abstract: In solutions of myofibrillar protein extracted from giant squid (*Dosidicus*  
24 *gigas*), the size-coarsening process of protein nanofiber is complex. At high  
25 temperature (25°C), nanofiber keeps growth but with two distinguishable patterns,  
26 slow rate at the initial stage with  $t^{0.2}$  and the fast one at the late stage with  $t^{2.3}$ . The  
27 intersection of these two slopes is around 300 min. Meanwhile, protein concentration  
28 in solution enhances as well. These behaviors contradict to the prediction of Ostwald  
29 ripening. Thus, we call this process as abnormal. These abnormal behaviors come  
30 from the conformation change of some types of constitution protein molecules with  
31 chemical potential reduction when they dissolve from nanofiber to solution. On the  
32 other hand, low temperature (10°C) depresses this size growth. This observation  
33 suggests that temperature regulates protein molecule conformation change in  
34 nanofiber. The consequence of this abnormal Ostwald ripening process is that all  
35 protein molecules in nanofiber are redistributed. Protein molecules with the absence  
36 of conformation change in dissolution accumulate in nanofiber to cause it growing,  
37 while the rest concentrates in solution.

38 Keywords: Abnormal Ostwald ripening, myofibrillar protein, molecular conformation  
39 change, nanofiber

40  
41  
42  
43  
44  
45  
46  
47  
48  
49

50 In 1896 Wilhelm Ostwald described the phenomenon of large particle growth in  
51 the cost of small one as Ostwald ripening due to the surface tension which is  
52 proportional to the particles curvature(1-3). *As a result, the solute concentration keeps*  
53 *reduction throughout size-coarsening process.* Meanwhile, an essential prerequisite,  
54 no molecular conformation change when a molecule transfers from one phase to  
55 another, exists but is always ignored. This condition is satisfied in inorganic and  
56 organic compounds. However, in protein solutions containing particles with various  
57 sizes, it should be cautious to apply Ostwald ripening theory in the size-coarsening  
58 process because protein molecules are sensitive to the ambient conditions. Even salt  
59 concentration variation could induce protein molecule conformation change(4). Thus,  
60 *it is worth to verify Ostwald ripening theory in protein solutions.*

61 The existence of nanofiber in solutions of myofibrillar protein extracted from  
62 giant squid (*Dosidicus gigas*) is verified(5). In order to investigate its size-coarsening  
63 process in this solution, 2.73 mg mL<sup>-1</sup> myofibrillar protein was diluted 10 times by the  
64 buffer solution, and was assessed by the dynamic light scattering (DLS) technique and  
65 the fluorescence spectroscopy (FS) technique immediately.

66 In Fig. 1a, the pattern of light intensity on time depends on the temperature. High  
67 temperature (25°C) allows the light intensity monotonically growing, while low  
68 temperature (10°C) depresses this growth with almost constant light intensity  
69 throughout the experiment. Due to high activity of enzymolysis in myofibrillar protein  
70 at 25°C(6), it is necessary to estimate its influence in this study. In Fig. 1b, the  
71 apparent concentrations of myofibrillar protein in three cases were determined via

72 Bradford protein assay. It displaces two issues: 1) the apparent protein concentration  
73 remarkable increase overnight no matter whether ethylenediaminetetra acetic acid  
74 (EDTA) is present or absent; 2) the existence of EDTA has minor effect on the  
75 apparent concentration determinations. Since EDTA is a efficient agent to depress  
76 enzymolysis(7), it could be concluded that the effect of enzymolysis could be ignored  
77 in this study.

78 Another issue of interest in Fig. 1b is the apparent concentration rising with time.  
79 Ref. 5 illustrates that the apparent concentration increase via Bradford protein assay  
80 hints the more surface of protein molecule exploring to the solvent. In other words,  
81 nanofiber dissolves into several pieces with small size. However, the last stage of light  
82 intensity observation with fast increase at 25°C in Fig. 1a is against this prediction  
83 because the light intensity is proportional to the particle number density and is  
84 six-power of the size of particle(8). The light intensity increment due to the number  
85 density increase is much smaller than its reduction due to the size shrinking during the  
86 dissolution process. In order to clarify this puzzle, the size of corresponding nanofiber  
87 was evaluated via DLS technique. Fig. 1c reveals that the decay of the autocorrelation  
88 function  $g_2(\tau)-1$  becomes slow throughout the experiment. With the aid of Laplace  
89 transform, the corresponding decay time distribution was obtained (Fig. S1). The  
90 decay time of the slow mode  $\tau$  was assessed to construct Fig. S2. In contrast to the  
91 case in 10°C in which  $\tau$  is almost constant throughout experiment (data do not  
92 present), the dependency of  $\tau$  on the observation time has two patterns,  $t^{0.2}$  and  $t^{2.3}$ ,  
93 with the intersection of these two slopes around 300 min (Fig. S2). In the initial stage

94 of size-coarsening process, 0.2 is close to the value in phase-separation process,  
95 0.212(9, 10). But in the second stage, to the best of our knowledge, 2.3 is larger than  
96 any reported value(11, 12) .

97 Now there is a problem. On the one hand, nanofiber keeps growth. On the other  
98 hand, protein concentration in solution increases as well, which contradicts to the  
99 prediction of Ostwald ripening. How does this phenomenon occur? Hinted by the fact  
100 of tropomyosin (Fig. S3) dissolution from F-actin with the expense of partial  
101 degradation of helical structure(13), we hypothesized this abnormal Ostwald ripening  
102 due to some types of protein molecule conformation change when these molecules  
103 dissolve from nanofiber to solution with chemical potential reduction. As a result,  
104 these types of protein molecules concentrate in solutions. In order to verify the  
105 hypothesis of protein molecule conformation change, FS technique was carried out  
106 immediately after  $2.15 \text{ mg mL}^{-1}$  myofibrillar protein solution was diluted 10 times.  
107 The reason to pick up FS is the high sensitivity of tryptophan to the local environment  
108 in intrinsic protein florescence. As a result, change in the emission spectrum of  
109 tryptophan is utilized to probe protein conformation change(14, 15). Especially for  
110 minor change without secondary structure modification, such as the case of this study,  
111 the traditional techniques, such as circular dichroism (CD), are infeasible. The  
112 florescent spectra of the corresponding solution at various intervals were displayed in  
113 Fig. 1d, in which the fluorescent light intensity keeps reduction with maximum of  
114 fluorescent spectra shifting from 309 nm to 307 nm. This observation indicates the  
115 occurrence of conformation change of protein molecules. In addition, the interval of

116 remarkable fluorescent light intensity reduction, around 5 h, coincides with the  
117 intersection of the two slopes in Fig. S2.

118 Thus, at 25°C the slow growth rate of nanofiber at the initial stage (Fig. S1) may  
119 come from the fact of high activation energy for protein molecule conformation  
120 change, for instance, 430-490 kJ mol<sup>-1</sup> for ovalbumin at pH 7<sup>(16)</sup>.

121 But what factors do dominate protein molecule conformation change? Fig. 1a hints  
122 that it is temperature rather than protein molecule concentration. When temperature is  
123 low as 10°C, nanofiber is stable, which is partially verified by the fact of animal  
124 muscles with less muscle shortening and drip loss around 10~15°C(17, 18). Only is  
125 temperature high, such as 25°C, some types of protein molecules commencing  
126 molecular conformation change when they redistribute from nanofiber to solution in  
127 myofibrillar protein. Indeed, it is found that the tropomyosin dissociation from F-actin  
128 has a minimum temperature of 35-40°C(19).

129 The aforementioned discussions lead to a prediction that in size-coarsening process  
130 protein molecules with the absence of conformation change when dissolving from  
131 nanofiber to solution accumulate to nanofiber while the rest types are condensed in  
132 the solution. In other words, the compositions of solution and nanofiber respectively  
133 become purer after this size-coarsening process, which was tested by the differential  
134 scanning calorimetry (DSC) assessment (Fig. 2 and Table 2), in which solutions with  
135 2.71 mg mL<sup>-1</sup> and 0.26 mg mL<sup>-1</sup> respectively were assessed. The dilution operation  
136 induces the size-coarsening process in myofibrillar protein solutions. Compared with  
137 the high concentration solution, the peak is sharp in the thermogram with the low

138 denatured temperature and less denatured enthalpy in low concentration solution. The  
139 sharp peak indicates the purer composition in nanofiber(20). In addition, the dilution  
140 operation causes nanofiber loose, corroborated by fractal dimension  $d_f$  assessment  
141 with monotonic reduction (Fig S4 and Table S1). This may be the reason for low  
142 denatured temperature and less denatured enthalpy in the low concentration solution.

143 From the aforementioned discussion, a crucial conclusion is made that protein  
144 molecule conformation change is an essential prerequisite for muscle protein  
145 dissolution from the solid state to solution. In addition, this conformation change  
146 process is regulated by temperature rather than protein molecule concentration. Just  
147 because many food additives have strong interactions with muscle protein molecules,  
148 they can significantly affect muscle protein molecules dissolution and thereby can  
149 influence the properties of final products made by muscle (21, 22). This observation  
150 also sheds light on clinical practices, for instance, the mechanism study of  
151 rhabdomyolysis, a complex process associated with morbidity and mortality(23).

152

### 153 **SUPPORTING MATERIAL**

154 Supporting Materials and Methods, five figures, and one table are available.

### 155 **AUTHOR CONTRIBUTIONS**

156 F. N. and R. Z. have equal contribution in this study. F. N., R. Z., and J. F. carried out  
157 the experiments. W. P. designed the study. F. N., R. Z. and W. P. analyzed the data,  
158 discussed and interpreted results. W. P. wrote the manuscript.

### 159 **ACKNOWLEDGEMENTS**

160 The authors wish to thank Dr. Peter G. Vekilov of University of Houston for many  
161 helpful comments and criticisms. This work was supported by grants from the  
162 National Natural Science Foundation of China (31171713, 31701650), the Foundation  
163 of Food Science and Engineering, the Most Important Discipline of Zhejiang Province  
164 (JYTsp20142014), The Natural Science Foundation of Zhejiang Province  
165 (LY17C200004).

166 The authors declare that they have no known competing financial interests or personal  
167 relationships that could have appeared to influence the work reported in this paper.

## 168 **SUPPORTING CITATIONS**

169 References (24–30) appear in the Supporting Material.

170

## 171 **REFERENCES**

- 172 1. Ostwald, W. 1896. Lehrbuch der Allgemeinen Chemie, Leipzig, Germany.
- 173 2. Ostwald, W. 1897. Studien über die Bildung und Umwandlung fester Körper. Z. Phys. Chem.  
174 22:289-330.
- 175 3. Ratke, L., and P. W. Voorhees. 2002. Growth and Coarsening Ostwald Ripening in Material  
176 Processing. Springer-Verlag Berlin Heidelberg, Berlin, Germany.
- 177 4. Zhang, R., R. Zhou, W. Pan, W. Lin, X. Zhang, M. Li, J. Li, F. Niu, and A. Li. 2017. Salting-in effect  
178 on muscle protein extracted from giant squid (*Dosidicus gigas*). Food Chem. 215:256-262.
- 179 5. Niu, F., R. Zhang, J. Fan, W. Pan, and A. Li. submitted The Existence of Nanofiber in Solutions  
180 of Myofibrillar Protein Extracted from Giant Squid (*Dosidicus gigas*). submitted.
- 181 6. Gomez-Guillén, M. C., J. L. Hurtado, and P. Montero. 2002. Autolysis and protease inhibition  
182 effects on dynamic viscoelastic properties during thermal gelation of squid muscle. J. Food Sci.  
183 67:2491-2496.
- 184 7. Konno, K., C. Young-Je, T. Yoshioka, P. Shinho, and N. Seki. 2003. Thermal denaturation and  
185 autolysis profiles of myofibrillar proteins of mantle muscle of jumbo squid *Dosidicus gigas*.  
186 Fish. Sci. 69:204-209.
- 187 8. Schärftl, W. 2007. Light Scattering from Polymer Solutions and Nanoparticle Dispersions.  
188 Springer, Leipzig, Germany.
- 189 9. Langer, J. S. 1975. Spinodal Decomposition. Fluctuations, Instabilities, and Phase Transitions. T.  
190 Riste, editor. Springer-Verlag US Boston, MA, USA, pp. 19-42.
- 191 10. Langer, J. S., M. Bar-on, and H. D. Miller. 1975. New computational method in the theory of



- 192 spinodal decomposition. Phys. Rev. A 11:1417-1429.
- 193 11. Shi, B. Q., C. Harrison, and A. Cumming. 1993. Fast-Mode Kinetics in Surface-Mediated  
194 Phase-Separating Fluids. Phys. Rev. Lett. 70:206-209.
- 195 12. Tanaka, H., and T. Araki. 1998. Spontaneous Double Phase Separation Induced by Rapid  
196 Hydrodynamic Coarsening in Two-Dimensional Fluid Mixtures. Phys. Rev. Lett. 81:389-392.
- 197 13. Tanaka, H. 1972. The helix content of tropomyosin and the interaction between tropomyosin  
198 and F-actin under various conditions. Biochim. Biophys. Acta Protein Structure 278:556-566.
- 199 14. Lakowicz, J. R. 2006. Principles of Fluorescence Spectroscopy. Springer Science + Business  
200 Media, LLC, New York, NY, USA.
- 201 15. D'Auria, S., M. Staiano, I. M. Kuznetsova, and K. K.Turoverov. 2005. The combined use of  
202 fluorescence spectroscopy and x-ray crystallography greatly contributes to elucidating  
203 structure and dynamics of proteins. Reviews in Fluorescence. C. D. Geddes and J. R. Lakowicz,  
204 editors. Springer US, New York, USA, pp. 25-61.
- 205 16. Weijers, M., P. A. Barneveld, M. A. C. Stuart, and R. W. Visschers. 2003. Heat-induced  
206 denaturation and aggregation of ovalbumin at neutral pH described by irreversible first-order  
207 kinetics. Protein Sci. 12:2693–2703.
- 208 17. Honikel, K. O., C. J. Kim, and R. Hamm. 1986. Sarcomere Shortening of Prerigor Muscles and  
209 Its Influence on Drip Loss Meat Sci. 16:267-282.
- 210 18. Lesiak, M. T., D. G. Olson, C. A. Lesiak, and D. U. Ahn. 1996. Effects of Postmortem  
211 Temperature and Time on the WaterHolding Capacity of Hot-Boned Turkey Breast and Thigh  
212 Muscle. Meat Sci. 43:51-60.
- 213 19. Tanaka, H., and F. Oosawa. 1971. The effect of temperature on the interaction between  
214 F-actin and tropomyosin. Biochim. Biophys. Acta Bioenerg 253:274-283.
- 215 20. Chiu, M. H., and E. J. Prenner. 2011. Differential scanning calorimetry: An invaluable tool for a  
216 detailed thermodynamic characterization of macromolecules and their interactions. J. Pharm.  
217 Bioallied Sci. 3:39-59.
- 218 21. Sánchez-Alonso, I., M. T. Solas, and A. J. Borderías. 2007. Technological implications of  
219 addition of wheat dietary fibre to giant squid (*Dosidicus gigas*) surimi gels. J. Food Eng.  
220 81:404-411.
- 221 22. Gómez-Guillén, M. C., and A. J. B. P. Montero. 1997. Salt, Nonmuscle Proteins, and  
222 Hydrocolloids Affecting Rigidity Changes during Gelation of Giant Squid (*Dosidicus gigas*). J.  
223 Agric. Food Chem. 45:616–621.
- 224 23. Torres, P. A., J. A. Helmstetter, A. M. Kaye, and A. D. Kaye. 2015. Rhabdomyolysis:  
225 Pathogenesis, Diagnosis, and Treatment. Ochsner J. 15:58-69.
- 226 24. Hashimoto, K., S. Watabe, M. Kono, and K. Shiro. 1979. Muscle protein composition of sardine  
227 and mackerel. Bull. Jpn Soc. Sci. Fish. 45:1435-1441.
- 228 25. Konno, K., C. Young-Je, T. Yoshioka, P. Shinho, and N. Seki. 2003. Thermal denaturation and  
229 autolysis profiles of myofibrillar proteins of mantle muscle of jumbo squid *Dosidicus gigas*.  
230 Fish. Sci. 69:204-209.
- 231 26. Bradford, M. M. 1976. A Rapid and Sensitive Method for the Quantitation of Microgram  
232 Quantities of Protein Utilizing the Principle of Protein-Dye Binding Anal. Biochem.  
233 72:248-254.
- 234 27. Schatzel, K. 1993. Single-photon correlation techniques. Dynamic Light Scattering: The  
235 Method and Some Applications W. Brown, editor. Clarendon Press, Oxford, pp. 76-148.

- 236 28. Provencher, S. W. 1982. A constrained regularization method for inverting data represented  
237 by linear algebraic or integral equations. *Comput. Phys. Commun.* 27(3):213-324.
- 238 29. Provencher, S. W. 1982. CONTIN: A general purpose constrained regularization program for  
239 inverting noisy linear algebraic and integral equations. *Comput. Phys. Commun.*  
240 27(3):229-242.
- 241 30. Lin, M. Y., H. M. Lindsay, D. A. Weitz, R. C. Ball, R. Klein, and P. Meakin. 1989. Universality in  
242 colloid aggregation. *Nature* 339:360-363.
- 243

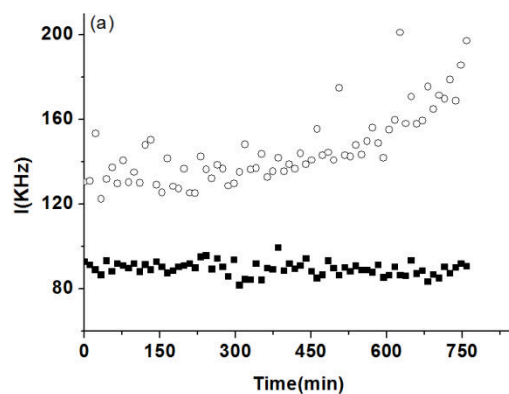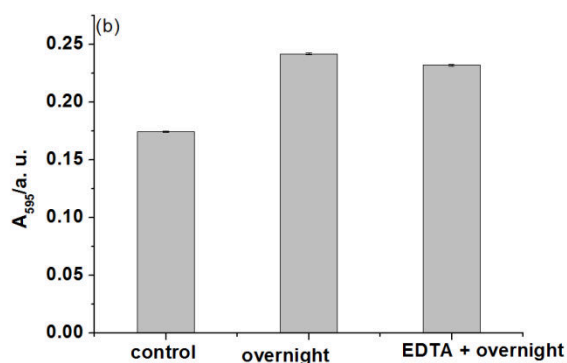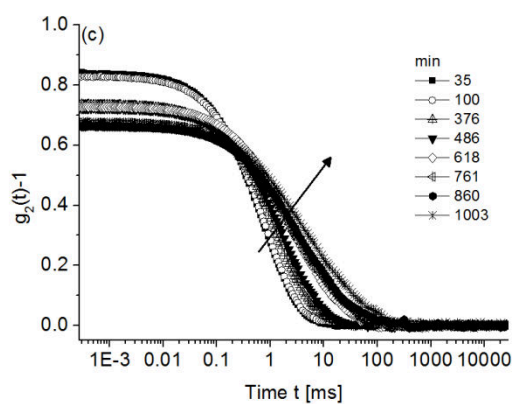

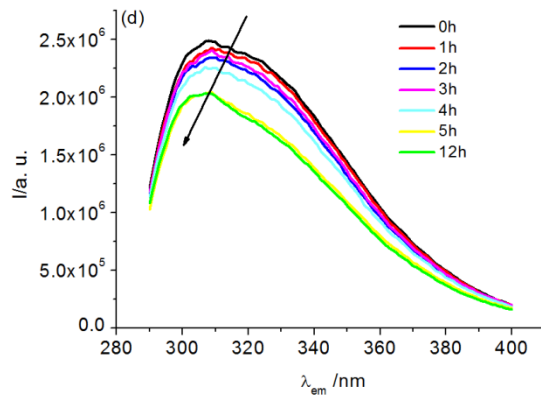

247

248 Figure 1 (a) Time evolutions of light intensity at various temperatures. Empty circle  
249 stands for 25°C with  $0.27 \text{ mg mL}^{-1}$  myofibrillar protein while solid square does for  
250 10°C at the same protein concentration. (b) The influence of enzyme on protein  
251 concentration assessment in myofibrillar protein solutions. The control is  $0.27 \text{ mg}$   
252  $\text{mL}^{-1}$  myofibrillar protein solution. While the middle one is the solution same as  
253 control but has stayed in a heat bath at 25°C overnight; and the right one is a sample  
254 same as the middle one but added EDTA to depress enzyme activity. The Bradford  
255 method was applied for absorbance determination. (C)The autocorrelation functions  
256 of DLS at 25 °C in Fig.1a at some intervals. (d) The fluorescence emission spectrums  
257 at various intervals, which displace light intensity reduction and maximum of  
258 fluorescent spectra shifting from 309 nm to 307 nm.

259

260

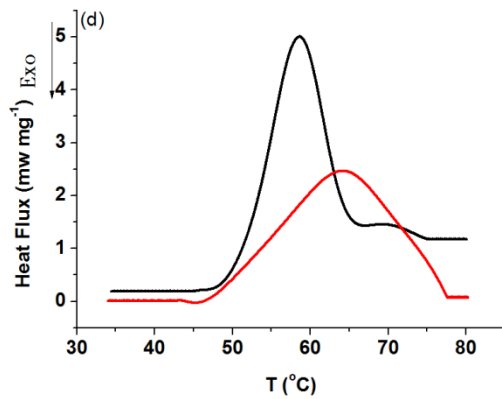

261

262 Figure 2. DSC determinations of myofibrillar protein solutions at two concentrations  
263 2.71 mg mL<sup>-1</sup> (black line) and 0.26 mg mL<sup>-1</sup> (red line).

264

265

Table 1 The thermal stability of particles under various dilution ratios

| Dilution ratio | T <sub>max</sub> (°C) | ΔH (J/s)           |
|----------------|-----------------------|--------------------|
| 1              | 63.9 <sup>a</sup>     | 0.529 <sup>a</sup> |
| 10             | 58.6 <sup>b</sup>     | 0.362 <sup>b</sup> |

266 T<sub>max</sub>, the denaturation temperature; ΔH, the endotherm enthalpy. Different letters (a-b) indicate  
267 significant (P < 0.05) difference within the same row.

268
